# Supplementary material
Source: PubMed Central journal article supplement (PMC6713291)
Supplement: NIHMS1537446-supplement-1.pdf [file NIHMS1537446-supplement-1.pdf]

**Cell Reports, Volume 28**

**Supplemental Information**

**A Spontaneous Aggressive ER $\alpha$ + Mammary**

**Tumor Model Is Driven by Kras Activation**

**Katie M. Campbell, Kathleen A. O'Leary, Debra E. Rugowski, William A. Mulligan, Erica K. Barnell, Zachary L. Skidmore, Kilannin Krysiak, Malachi Griffith, Linda A. Schuler, and Obi L. Griffith**



# Figure S2. Ras pathway alterations in human breast cancer datasets. Related to Figure 3 and Table S3.

**A.** Summary of samples assessed from publicly available human breast cancer datasets. Samples are differentiated as either 'ER+ or HR+/HER2-' or 'ER- or Not Defined' (indicated by color), as described in cBioPortal (Banerji et al., 2012; Cancer Genome Atlas Network, 2012; Curtis et al., 2012; Griffith et al., 2018; Lefebvre et al., 2016; Stephens et al., 2012). **B.** Somatic alterations detected in samples from A, categorized by gene (color) and ER status. Alterations are summarized as copy number amplifications (AMP), homozygous deletion (HOMDEL), or point mutations (MUT). **C-F.** Schematics Lollipop plots depicting specific point mutations identified in samples from A across Ras pathway genes (*HRAS*, *NRAS*, *DAB2IP*, and *RASAL2*).

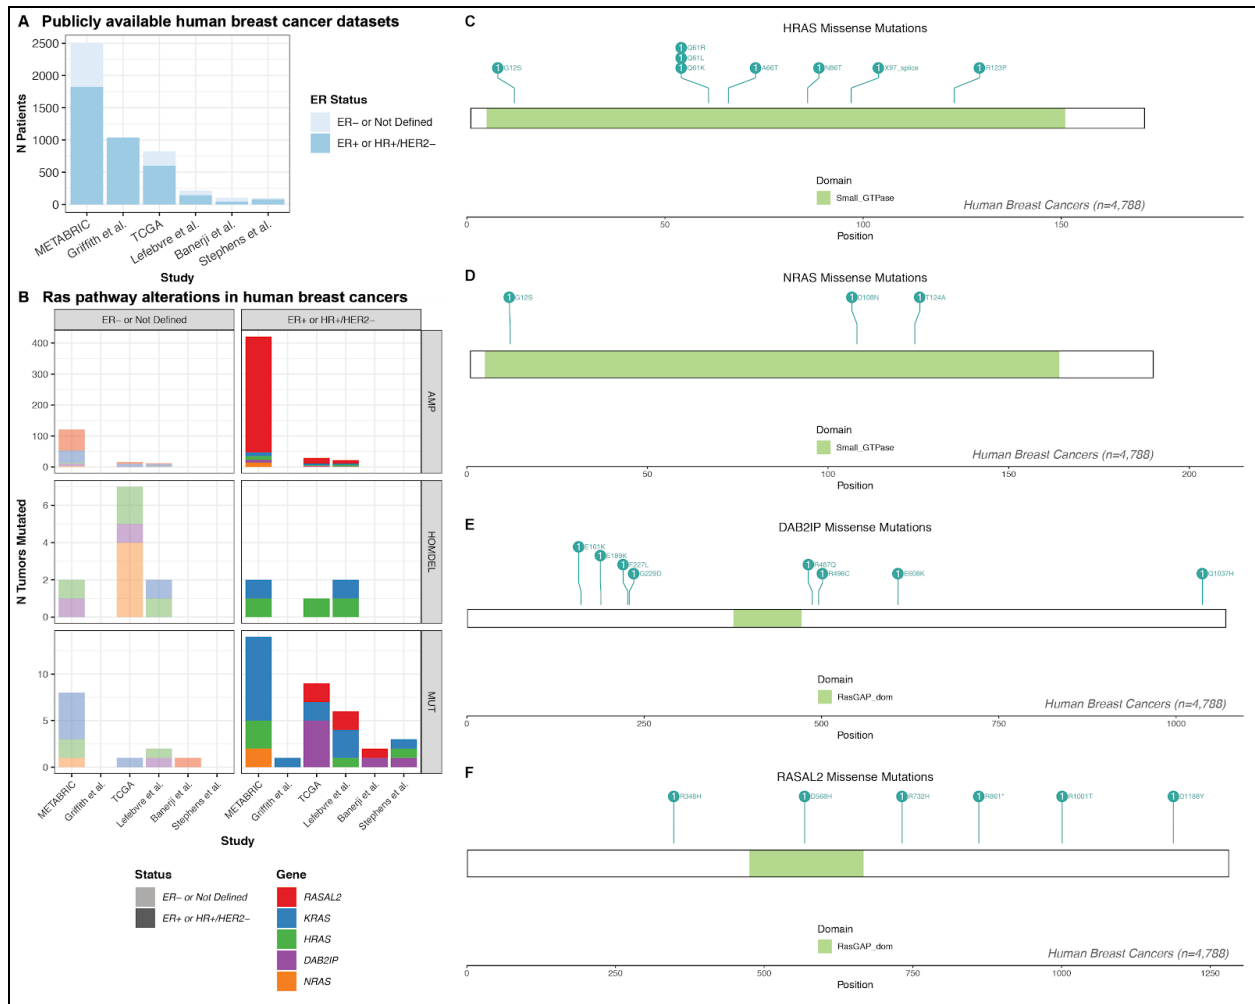

## Supplemental Tables

Table S3. Ras pathway alterations in human breast cancer datasets. Related to Figures 3 and S2.

The number of somatic alterations - including mutations, amplifications, and deletions - detected across public datasets. Values indicate the number of patients with alterations in each corresponding gene (row), or the total number of patients with mutations in any gene (bottom row; percent is calculated as the number of patients with alterations within the associated subtype). "NA" indicates that the gene was not evaluated in the corresponding gene (The Griffith et al. dataset did not evaluate mutations in genes other than *KRAS*). \* Patients may have alterations in more than one gene.

|                                                       | METABRIC<br>(n=2,506) |                | Griffith et al.<br>(n=1,038) | TCGA (n=825)   |                | Lefebvre et al.<br>(n=216) |               | Banerji et al.<br>(n=103) |               | Stephens et al.<br>(n=100) |               |
|-------------------------------------------------------|-----------------------|----------------|------------------------------|----------------|----------------|----------------------------|---------------|---------------------------|---------------|----------------------------|---------------|
|                                                       | ER+<br>(n=1,824)      | ER-<br>(n=682) | ER+<br>(n=1,038)             | ER+<br>(n=601) | ER-<br>(n=224) | ER+<br>(n=143)             | ER-<br>(n=73) | ER+<br>(n=44)             | ER-<br>(n=59) | ER+<br>(n=79)              | ER-<br>(n=21) |
| <i>KRAS</i>                                           | 22                    | 44             | 1                            | 7              | 9              | 8                          | 7             | 0                         | 0             | 1                          | 0             |
| <i>HRAS</i>                                           | 16                    | 6              | NA                           | 3              | 2              | 7                          | 4             | 0                         | 0             | 1                          | 0             |
| <i>NRAS</i>                                           | 15                    | 4              | NA                           | 2              | 4              | 1                          | 0             | 0                         | 0             | 0                          | 0             |
| <i>DAB2IP</i>                                         | 9                     | 9              | NA                           | 7              | 3              | 1                          | 2             | 1                         | 0             | 1                          | 0             |
| <i>RASAL2</i>                                         | 374                   | 68             | NA                           | 19             | 6              | 12                         | 3             | 1                         | 1             | 0                          | 0             |
| Total Patients<br>with Alterations*<br>(% of subtype) | 417<br>(22.9%)        | 121<br>(17.7%) | 1<br>(0.1%)                  | 37<br>(6.2%)   | 24<br>(10.7%)  | 26<br>(18.2%)              | 14<br>(19.2%) | 2<br>(4.5%)               | 1<br>(1.7%)   | 3<br>(3.8%)                | 0<br>(0%)     |
